# Supplementary material
Source: PubMed Central journal article supplement (PMC3038622)
Supplement: NIHMS258429-supplement-01.pdf [file NIHMS258429-supplement-01.pdf]

Fig. S1. Effects of varying concentrations of complexes on conformation of pBR322 plasmid DNA. The values Ri are relation complex:DNA (1) DNA in DMSO (2) Complex - DNA Ri 0.5, (3) Complex - DNA Ri 1, (4) Complex - DNA Ri 2 (5) Complex - DNA Ri 3 (6) Complex - DNA Ri 4, (7) Cisplatin - DNA Ri 1.

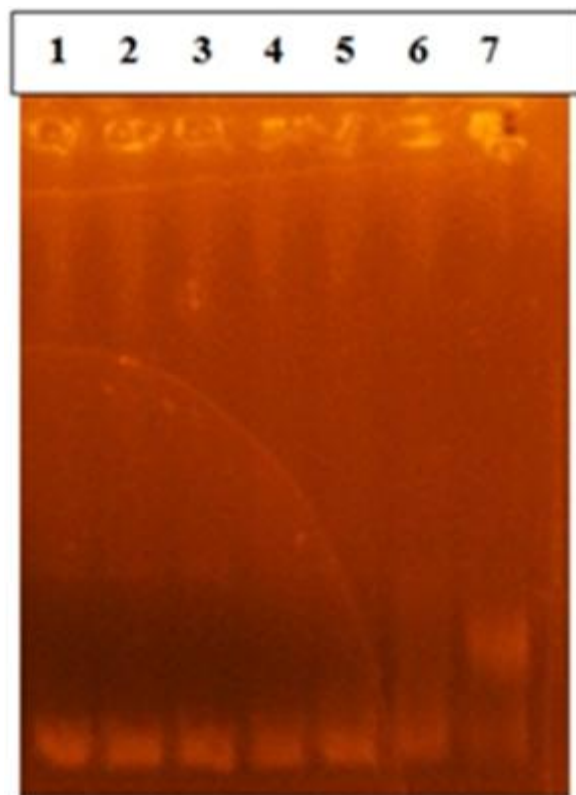

S1
